# Supplementary material
Source: PubMed Central journal article supplement (PMC6386554)
Supplement: NIHMS966848-supplement-Supplementary_Figure_1.pdf [file NIHMS966848-supplement-Supplementary_Figure_1.pdf]

# Supplementary Figure 1.

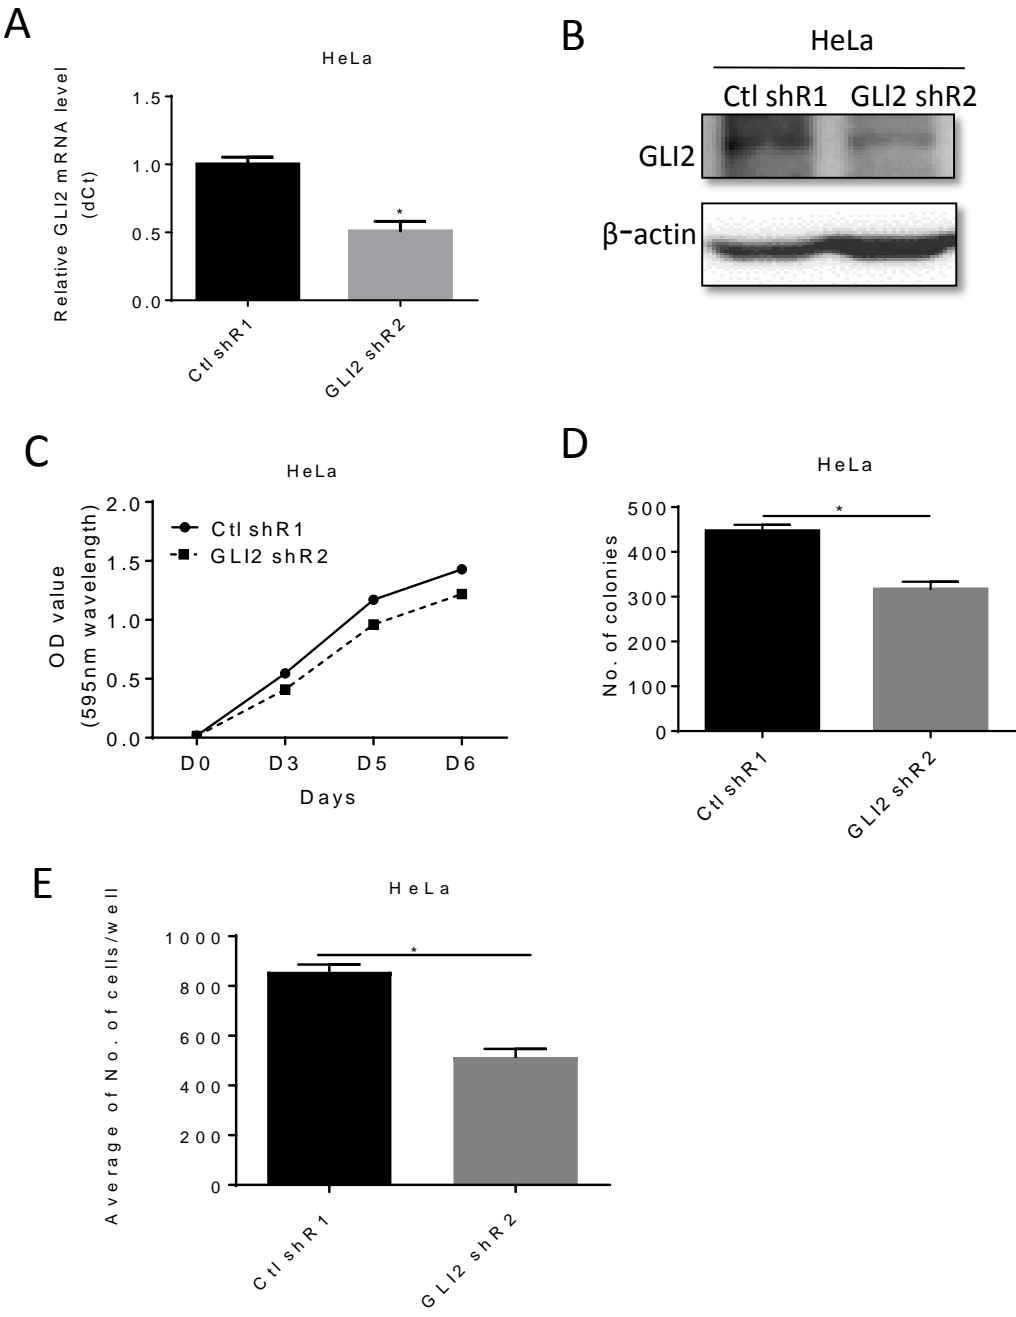

Supplementary Figure 1. Knockdown of GLI2 inhibited proliferation and migration in vitro. Stable GLI2 shRNA (GLI2 shR2) and control shRNA (CtlshR1) lentivectors were transduced into HeLa cell line. **(A)** Confirmation of stable knockdown of GLI2 mRNA level by qRT-PCR and **(B)** GLI2 protein level by Western blot.  $\beta$ -actin level was used to validate equal sample loading for the Western blotting and GAPDH transcript was used for normalization of the qRT-PCR assay. **(C)** GLI2 knockdown inhibited cell growth by MTT assay and **(D)** soft agar assay. **(E)** GLI2 knockdown inhibited migration of cervical cancer cells. Data presented are mean  $\pm$  SEM of triplicate measurements. \*P<0.05.

# Supplementary Figure 2.

**A**

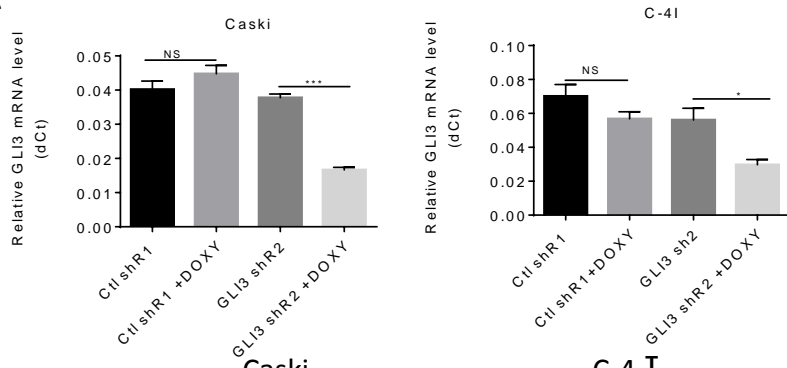

**B**

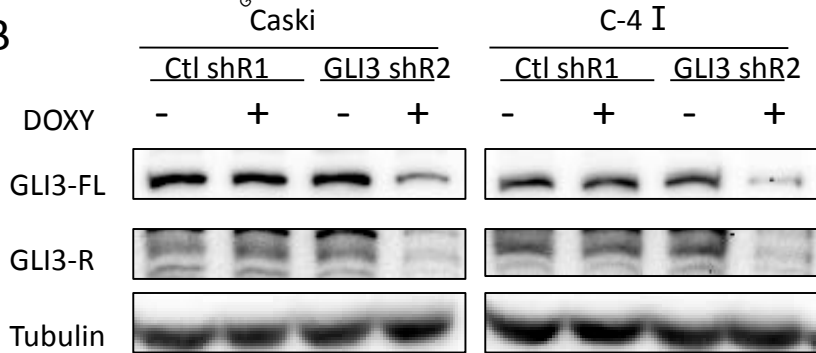

**C**

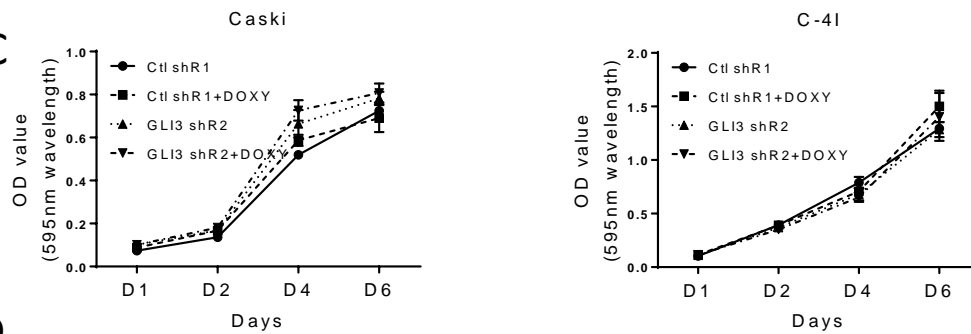

**D**

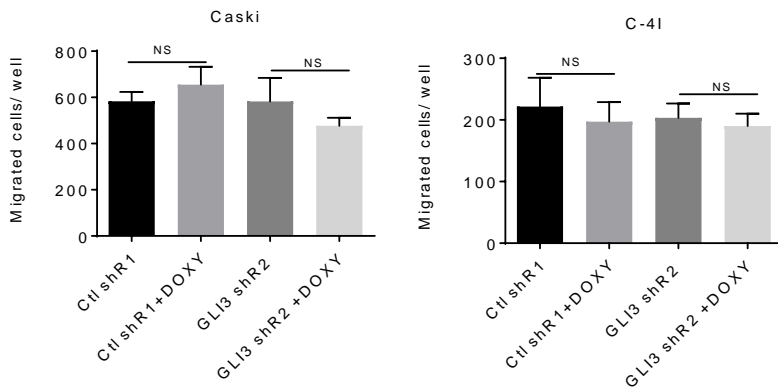

Supplementary Figure 2. Knockdown of GLI3 had no effect on proliferation and migration in vitro. Inducible GLI3 shRNA (GLI3 shR2) and control shRNA (CtlshR2) lentivectors were transduced into Caski and C-4 I cell lines. **(A)** Confirmation of stable knockdown of GLI3 mRNA level by qRT-PCR and **(B)** GLI3 protein level by Western blot. Tubulin level was used to validate equal sample loading for the western blotting and GAPDH transcript was used for normalization of the qRT-PCR assay. **(C)** GLI3 knockdown had no effect on cell growth by MTT assay. **(D)** GLI3 knockdown had no effect on migration in cervical cancer cells. Data presented were mean  $\pm$  SEM of triplicate measurements.
